# Supplementary material for: An enzymatic microfluidic sensor for β-lactam antibiotics based on cross-linked ancestral β-lactamase crystals
Source: Royal Society of Chemistry journal article supplement (doi:10.1039/d5na00906e), 2026-01-01
Supplement: d5na00906e1.zip [file supplementary-material.docx]

Supplementary Information

Enzymatic microfluidic sensor for β-lactam antibiotics based on cross-linked ancestral β-lactamase crystals

Isaac Rodríguez-Ruiza, Pablo Moya Garridob, Valeria A. Rissoc,d, Sergio Martínez-Rodríguezd,e,f, Sébastien Teychenéa, José Manuel Sanchez-Ruizc,d, José A. Gavirab,d,f*

aLaboratoire de Génie Chimique, CNRS, INP, UPS, Toulouse, France.

bLaboratory of Crystallographic Studies, IACT-CSIC. Avd. de las Palmeras, 4, 18100-Armilla, Granada, Spain.

cDepartamento de Quimica Fisica, Facultad de Ciencias, Universidad de Granada, 18071- Granada, Spain.

dUnidad de Excelencia de Química Aplicada a Biomedicina y Medioambiente (UEQ), Universidad de Granada, 18071- Granada, Spain.

eDepartment of Biochemistry and Molecular Biology III and Immunology. University of Granada, 18071- Granada, Spain.

fRaw Materials, Human and Environmental Health, UGR, Associated Unit of the CSIC by the IACT-CSIC, Avd. de las Palmeras, 4, 18100-Armilla, Granada, Spain.


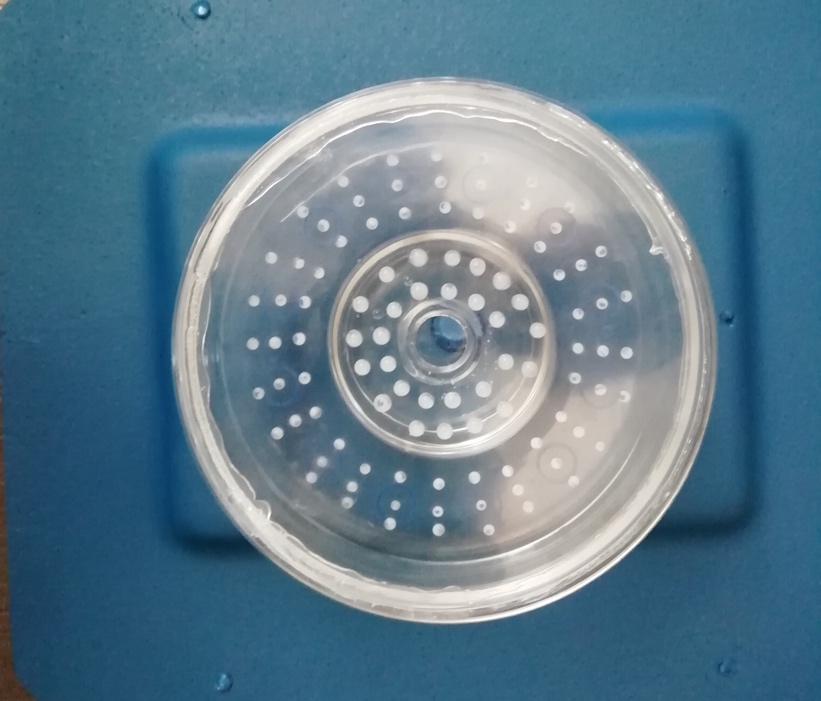


**Figure S1.** Crystallization set up in a mushroom device, allowing up to 100 drops to be run **simultaneously**. Drops were prepared by mixing protein and precipitant solutions in a 1:1 ratio (2 + 2 μL) and the reservoir contained 5 mL of precipitant solution (5.0 M sodium formate, 0.1 M sodium acetate pH 4.0).

| **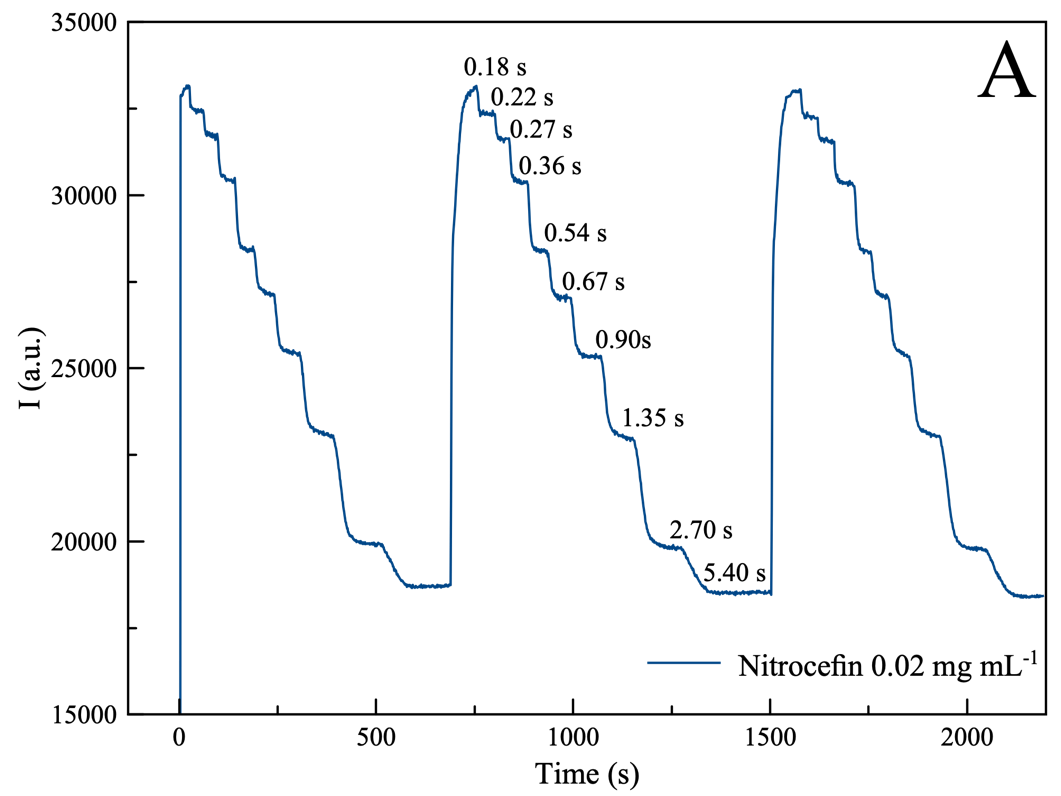** |
| --- |
| **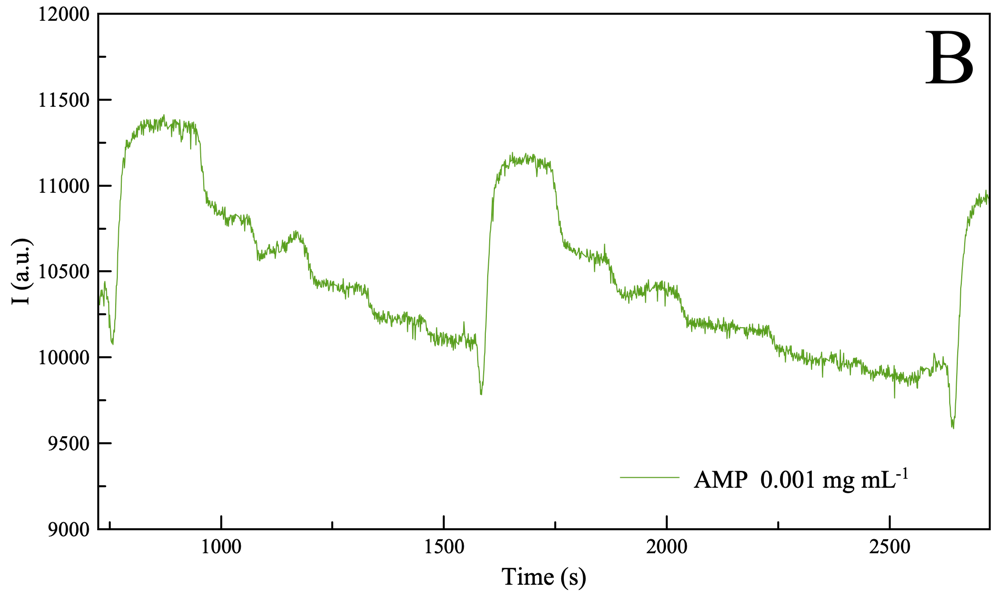** |
| **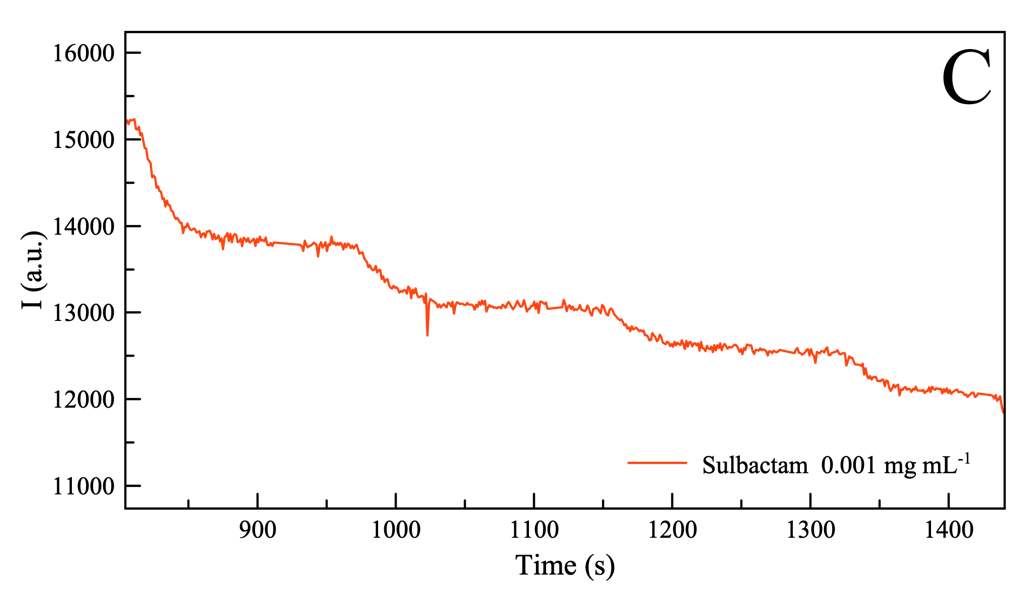** |
| **Figure S2.** A) Shows the hydrolysis reaction of nitrocefin by lactamase as a function of time for the 3 consecutive cycles each composed of 10 flow rates. B) Depicted two cycles of an inhibition experiment using ampicillin and C) a single cycle of an inhibition experiment with sulbactam. Each plateau on B and C corresponds to a fix concentration of the inhibitor. |

**Figure S3.** Lactamase activity in crystalline state. A) Activity and dissolution of an ancestral lactamase crystal marked with a white arrow. In the second frame, the crystal is fully dissolved. B) Activity of βLa-CLECs, which slowly convert all nitrocefin, painting the drops pink in approximately five minutes. The single crystal is still visible at the end of the experiment when the drops are practically evaporated.
